# Supplementary material for: Impact of Climate and Slope Aspects on the Composition of Soil Bacterial Communities Involved in Pedogenetic Processes along the Chilean Coastal Cordillera
Source: MDPI journal article supplement (doi:10.3390/microorganisms10050847), 2022-04-20
Supplement: s1 [file s1]

**Table S1.** Overview of selected soil physicochemical data along the depth profiles of the north and south-facing mid slopes in the four climate regions. Soil samples were collected in biological replicates.

| Study site               | Depth   | IGSN                      | Clay* | Sand* | Silt* | pH*                  | TOC  | C/N  | Plant-available        | Total     | BD*                   | Total   | Fe <sub>ox</sub> /Fe <sub>d</sub> * |
|--------------------------|---------|---------------------------|-------|-------|-------|----------------------|------|------|------------------------|-----------|-----------------------|---------|-------------------------------------|
|                          |         |                           |       |       |       |                      |      |      | P*                     | Nitrogen* |                       | Sulfur* |                                     |
|                          | [cm]    |                           | [%]   | [%]   | [%]   | (CaCl <sub>2</sub> ) | [%]  |      | [mg kg <sup>-1</sup> ] | [%]       | [Mg m <sup>-3</sup> ] | [-]     | [-]                                 |
| <b>Pan de Azúcar</b>     |         |                           |       |       |       |                      |      |      |                        |           |                       |         |                                     |
| (North-facing mid slope) | 0 - 5   | <a href="#">GFRO100UD</a> | 10.0  | 68.4  | 21.6  | 8.10                 | 0.05 | 2.9  | 0.44                   | 0.02      | 1.20                  | 0.10    | 0.18                                |
|                          | 5 - 10  | <a href="#">GFRO100UE</a> | 9.1   | 78.7  | 12.2  | 8.12                 | 0.05 | 3.4  | 0.27                   | 0.01      | 1.37                  | 0.44    | 0.08                                |
|                          | 10 - 20 | <a href="#">GFRO100UF</a> | 18.4  | 70.7  | 10.9  | 8.09                 | 0.05 | 3.2  | 1.63                   | 0.02      | 1.32                  | 2.88    | 0.10                                |
|                          | 20 - 30 | <a href="#">GFRO100UG</a> | 18.5  | 53.6  | 27.9  | 7.96                 | 0.05 | 3.2  | 5.50                   | 0.02      | n.d.                  | 3.84    | 0.05                                |
|                          | 30 - 40 | <a href="#">GFRO100UH</a> | 18.5  | 53.6  | 27.9  | 7.96                 | 0.05 | 3.2  | 5.50                   | 0.02      | n.d.                  | 3.84    | 0.05                                |
| <b>Replicates</b>        | 0 - 5   | <a href="#">GFLMM00LP</a> | 12.5  | 67.0  | 20.5  | 7.93                 | 0.15 | n.d. | n.d.                   | n.d.      | 1.23                  | n.d.    | n.d.                                |
|                          | 5 - 10  | <a href="#">GFLMM00NW</a> | n.d.  | n.d.  | n.d.  | n.d.                 | 0.05 | n.d. | n.d.                   | n.d.      | n.d.                  | n.d.    | n.d.                                |
|                          | 10 - 20 | <a href="#">GFLMM00NX</a> | n.d.  | n.d.  | n.d.  | n.d.                 | 0.05 | n.d. | n.d.                   | n.d.      | n.d.                  | n.d.    | n.d.                                |
|                          | 20 - 30 | <a href="#">GFLMM00NY</a> | n.d.  | n.d.  | n.d.  | n.d.                 | 0.05 | n.d. | n.d.                   | n.d.      | n.d.                  | n.d.    | n.d.                                |
|                          | 30 - 40 | <a href="#">GFLMM00OZ</a> | n.d.  | n.d.  | n.d.  | n.d.                 | 0.05 | n.d. | n.d.                   | n.d.      | n.d.                  | n.d.    | n.d.                                |
| <b>Santa Gracia</b>      |         |                           |       |       |       |                      |      |      |                        |           |                       |         |                                     |
| (North-facing mid slope) | 0 - 5   | <a href="#">GFRO100VF</a> | 10.3  | 74.8  | 14.9  | 6.21                 | 0.3  | 7.1  | 36.61                  | 0.04      | 1.54                  | 0.02    | 0.64                                |
|                          | 5 - 10  | <a href="#">GFRO100VG</a> | 11.4  | 77.8  | 10.8  | n.d.                 | 0.31 | n.d. | 37.21                  | n.d.      | 1.62                  | n.d.    | n.d.                                |
|                          | 10 - 20 | <a href="#">GFRO100VH</a> | 14.2  | 74.5  | 11.4  | 5.77                 | 0.2  | n.d. | n.d.                   | n.d.      | 1.65                  | n.d.    | n.d.                                |
|                          | 20 - 30 | <a href="#">GFRO100VI</a> | 20.0  | 65.5  | 14.4  | n.d.                 | 0.05 | n.d. | n.d.                   | n.d.      | 1.66                  | n.d.    | n.d.                                |
|                          | 30 - 40 | <a href="#">GFRO100VJ</a> | 20.0  | 65.5  | 14.4  | n.d.                 | 0.05 | n.d. | n.d.                   | n.d.      | 1.66                  | n.d.    | n.d.                                |
| <b>Replicates</b>        | 0 - 5   | <a href="#">GFLMM00NS</a> | 12.9  | 69.9  | 17.2  | n.d.                 | 0.25 | n.d. | 88.54                  | n.d.      | 1.53                  | n.d.    | n.d.                                |
|                          | 5 - 10  | <a href="#">GFLMM00NT</a> | 11.3  | 73.1  | 15.6  | 6.22                 | 0.17 | 4.8  | 48.30                  | 0.04      | 1.45                  | 0.03    | 0.31                                |
|                          | 10 - 20 | <a href="#">GFLMM00NU</a> | 23.7  | 59.9  | 16.4  | n.d.                 | 0.17 | n.d. | 88.54                  | n.d.      | 1.39                  | n.d.    | n.d.                                |
|                          | 20 - 30 | <a href="#">GFLMM00NV</a> | 29.8  | 58.7  | 11.5  | 6.00                 | 0.13 | 4.6  | 9.76                   | 0.03      | n.d.                  | 0.02    | 0.37                                |
|                          | 30 - 40 | <a href="#">GFLMM00OZ</a> | 29.8  | 58.7  | 11.5  | 6.00                 | 0.13 | 4.6  | 9.76                   | 0.03      | n.d.                  | 0.02    | 0.37                                |
| <b>La Campana</b>        |         |                           |       |       |       |                      |      |      |                        |           |                       |         |                                     |
| (North-facing mid slope) | 0 - 5   | <a href="#">GFRO1002V</a> | 9.2   | 72.5  | 18.3  | 5.74                 | 2.4  | 11.0 | 26.12                  | 0.22      | 1.30                  | 0.03    | 0.36                                |
|                          | 5 - 10  | <a href="#">GFRO1002W</a> | 8.3   | 72.8  | 18.9  | 5.37                 | 1.1  | 10.2 | 35.36                  | 0.11      | 1.35                  | 0.02    | 0.22                                |
|                          | 10 - 20 | <a href="#">GFRO1002X</a> | 9.5   | 73.3  | 17.2  | 5.06                 | 0.73 | 15.2 | 41.27                  | 0.05      | 1.51                  | 0.03    | 0.27                                |
|                          | 20 - 30 | <a href="#">GFRO1002Y</a> | 12.4  | 70.2  | 17.4  | 4.93                 | 0.47 | 11.9 | 21.64                  | 0.04      | 1.53                  | 0.03    | 0.19                                |
|                          | 30 - 40 | <a href="#">GFRO1002Z</a> | 12.4  | 70.2  | 17.4  | 4.93                 | 0.47 | 11.9 | 21.64                  | 0.04      | 1.53                  | 0.03    | 0.19                                |



|                                            |         |                           |      |      |      |      |      |      |       |      |      |      |      |
|--------------------------------------------|---------|---------------------------|------|------|------|------|------|------|-------|------|------|------|------|
| <i>Replicates</i>                          | 0 - 5   | <a href="#">GFLMM00NJ</a> | 7.3  | 77.5 | 15.2 | 6.41 | 0.58 | 8.3  | 28.22 | 0.07 | 1.54 | 0.03 | 1.06 |
|                                            | 5 - 10  | <a href="#">GFLMM00NK</a> | 7.8  | 75.4 | 16.8 | 6.57 | 0.5  | 10   | 7.04  | 0.05 | 1.50 | 0.02 | 0.74 |
|                                            | 10 - 20 | <a href="#">GFLMM00NL</a> | 6.5  | 81.5 | 12.0 | 6.56 | 0.19 | 3.8  | 6.18  | 0.05 | 1.45 | 0.05 | 0.65 |
|                                            | 20 - 40 | <a href="#">GFLMM00NM</a> | 8.4  | 77.9 | 13.7 | 6.22 | 0.18 | 4.5  | 5.64  | 0.04 | 1.50 | 0.04 | 0.57 |
|                                            |         |                           |      |      |      |      |      |      |       |      |      |      |      |
| <b>La Campana</b>                          |         |                           |      |      |      |      |      |      |       |      |      |      |      |
| <i>LCPED20</i><br>(South-facing mid slope) | 0 - 5   | <a href="#">GFRO10029</a> | 9.7  | 73.2 | 17.1 | 5.55 | 1.9  | 5    | 6.21  | 0.38 | 0.64 | 0.07 | 0.44 |
|                                            | 5 - 10  | <a href="#">GFRO1002A</a> | 8.9  | 74.7 | 16.5 | 5.34 | 1.7  | 12.1 | 6.81  | 0.14 | 1.04 | 0.03 | 0.31 |
|                                            | 10 - 20 | <a href="#">GFRO1002B</a> | 9.5  | 75.4 | 15.1 | 5.31 | 0.78 | 9.8  | 5.36  | 0.08 | 1.23 | 0.02 | 0.34 |
|                                            | 20 - 40 | <a href="#">GFRO1002C</a> | 10.5 | 75.5 | 14.1 | 5.06 | 0.65 | 8.1  | 4.33  | 0.08 | 1.25 | 0.02 | 0.29 |
|                                            |         |                           |      |      |      |      |      |      |       |      |      |      |      |
| <i>Replicates</i>                          | 0 - 5   | <a href="#">GFLMM00N2</a> | 10.1 | 70.9 | 19.0 | 6.12 | 5.9  | 10.9 | 9.56  | 0.54 | 0.87 | 0.06 | 0.66 |
|                                            | 5 - 10  | <a href="#">GFLMM00N3</a> | 12.0 | 71.7 | 16.3 | 5.97 | 3.1  | 6.1  | 6.84  | 0.51 | 0.86 | 0.05 | 0.50 |
|                                            | 10 - 20 | <a href="#">GFLMM00N4</a> | 11.9 | 72.9 | 15.2 | 5.64 | 1.7  | 7.1  | 3.82  | 0.24 | 1.20 | 0.03 | 0.41 |
|                                            | 20 - 40 | <a href="#">GFLMM00N5</a> | 10.3 | 74.6 | 15.1 | 5.45 | 1.1  | 10   | 4.89  | 0.11 | 1.12 | 0.03 | 0.45 |
|                                            |         |                           |      |      |      |      |      |      |       |      |      |      |      |
| <b>Nahuelbuta</b>                          |         |                           |      |      |      |      |      |      |       |      |      |      |      |
| <i>NAPED20</i><br>(South-facing mid slope) | 0 - 5   | <a href="#">GFRO10019</a> | 24.5 | 56.0 | 19.5 | 4.01 | 9.6  | 21.3 | 1.47  | 0.45 | 0.66 | 0.05 | 0.96 |
|                                            | 5 - 10  | <a href="#">GFRO10018</a> | 26.8 | 53.7 | 19.5 | 4.07 | 8.4  | 22.7 | 1.61  | 0.37 | 0.72 | 0.05 | 1.14 |
|                                            | 10 - 20 | <a href="#">GFRO1001A</a> | 27.6 | 51.3 | 21.1 | 4.15 | 7.3  | 22.1 | 2.61  | 0.33 | 0.74 | 0.07 | 0.75 |
|                                            | 20 - 40 | <a href="#">GFRO1001B</a> | 27.4 | 51.2 | 21.4 | 4.33 | 4.8  | 21.8 | 2.13  | 0.22 | 0.77 | 0.06 | 0.80 |
|                                            |         |                           |      |      |      |      |      |      |       |      |      |      |      |
| <i>Replicates</i>                          | 0 - 5   | <a href="#">GFLMM00ML</a> | 28.2 | 47.5 | 24.3 | 4.26 | 6.8  | 18.9 | 2.38  | 0.36 | 0.69 | 0.05 | 0.81 |
|                                            | 5 - 10  | <a href="#">GFLMM00MM</a> | 27.0 | 49.5 | 23.4 | 4.25 | 6.3  | 19.1 | 1.94  | 0.33 | 0.73 | 0.05 | 0.99 |
|                                            | 10 - 20 | <a href="#">GFLMM00MN</a> | 27.3 | 48.1 | 24.6 | 4.28 | 4.4  | 16.9 | 1.24  | 0.26 | 0.79 | 0.05 | 0.01 |
|                                            | 20 - 40 | <a href="#">GFLMM00MP</a> | 33.3 | 44.6 | 22.1 | 4.42 | 3.7  | 17.6 | 0.8   | 0.21 | 0.75 | 0.09 | 0.89 |
|                                            |         |                           |      |      |      |      |      |      |       |      |      |      |      |

\* Bernhard et al. (2018, <https://doi.org/10.1016/j.catena.2018.06.018>)

n.d. = not  
determined.

**Table S2.** List of total amplicon sequence variants (ASVs) per sample. Sequence data was obtained by Illumina HiSeq amplicon sequencing of 16S rRNA gene fragments. Biological duplicates are indicated.

|                             |         |                           |          |                      | ASV reads |      |
|-----------------------------|---------|---------------------------|----------|----------------------|-----------|------|
| Study site                  | Depth   | IGSN                      | filtered | merged & orientation |           |      |
|                             | [cm]    |                           |          | corrected            | kept [%]  |      |
| Pan de Azúcar               |         |                           |          |                      |           |      |
|                             | 0 - 5   | <a href="#">GFRO100UD</a> | 453,688  | 382,353              | 363,088   | 80   |
| <i>AZPED21</i>              | 5 - 10  | <a href="#">GFRO100UE</a> | 76,688   | 60,667               | 60,116    | 78.4 |
| (North-facing mid<br>slope) | 10 - 20 | <a href="#">GFRO100UF</a> | 47,723   | 39,029               | 38,988    | 81.7 |
|                             | 20 - 40 | <a href="#">GFRO100UG</a> | 66,472   | 51,251               | 51,225    | 77.1 |
| <i>Replicates</i>           | 0 - 5   | <a href="#">GFLMM00LP</a> | 530,363  | 444,676              | 408,694   | 77.1 |
|                             | 5 - 10  | <a href="#">GFLMM00NW</a> | 133,561  | 114,613              | 113,475   | 85   |
|                             | 10 - 20 | <a href="#">GFLMM00NX</a> | 53,535   | 41,450               | 41,376    | 77.3 |
|                             | 20 - 40 | <a href="#">GFLMM00NY</a> | 112,257  | 92,337               | 91,441    | 81.5 |
| Santa Gracia                |         |                           |          |                      |           |      |
|                             | 0 - 5   | <a href="#">GFRO100VF</a> | 465,726  | 397,870              | 382,245   | 82.1 |
| <i>SGPED70</i>              | 5 - 10  | <a href="#">GFRO100VG</a> | 69,582   | 48,431               | 48,255    | 69.3 |
| (North-facing mid<br>slope) | 10 - 20 | <a href="#">GFRO100VH</a> | 105,326  | 78,781               | 78,631    | 74.7 |
|                             | 20 - 40 | <a href="#">GFRO100VJ</a> | 176,644  | 135,840              | 135,231   | 76.6 |
| <i>Replicates</i>           | 0 - 5   | <a href="#">GFLMM00NS</a> | 413,582  | 354,139              | 336,095   | 81.3 |
|                             | 5 - 10  | <a href="#">GFLMM00NT</a> | 116,196  | 87,599               | 87,268    | 75.1 |
|                             | 10 - 20 | <a href="#">GFLMM00NU</a> | 160,225  | 121,536              | 121,163   | 75.6 |
|                             | 20 - 40 | <a href="#">GFLMM00NV</a> | 92,040   | 67,921               | 67,555    | 73.4 |
| La Campana                  |         |                           |          |                      |           |      |
|                             | 0 - 5   | <a href="#">GFRO1002V</a> | 55,263   | 33,699               | 33,689    | 61   |
| <i>LCPED40</i>              | 5 - 10  | <a href="#">GFRO1002W</a> | 196,807  | 147,923              | 147,647   | 75   |
| (North-facing mid<br>slope) | 10 - 20 | <a href="#">GFRO1002X</a> | 310,925  | 236,636              | 235,973   | 75.9 |
|                             | 20 - 40 | <a href="#">GFRO1002Y</a> | 340,144  | 267,038              | 264,541   | 77.8 |
| <i>Replicates</i>           | 0 - 5   | <a href="#">GFLMM00NA</a> | 427,504  | 328,626              | 325,180   | 76.1 |
|                             | 5 - 10  | <a href="#">GFLMM00NB</a> | 218,074  | 153,877              | 152,818   | 70.1 |
|                             | 10 - 20 | <a href="#">GFLMM00NC</a> | 353,118  | 265,790              | 264,990   | 75   |
|                             | 20 - 40 | <a href="#">GFLMM00ND</a> | 352,435  | 270,419              | 263,524   | 74.8 |

|                          |         |                           |         |         |         |      |
|--------------------------|---------|---------------------------|---------|---------|---------|------|
| <b>Nahuelbuta</b>        |         |                           |         |         |         |      |
|                          | 0 - 5   | <a href="#">GFRO1001R</a> | 397,206 | 334,150 | 314,133 | 79.1 |
| <b>NAPED40</b>           | 5 - 10  | <a href="#">GFRO1001S</a> | 106,925 | 79,046  | 77,277  | 72.3 |
| (North-facing mid slope) | 10 - 20 | <a href="#">GFRO1001T</a> | 188,950 | 146,157 | 142,210 | 75.3 |
|                          | 20 - 40 | <a href="#">GFRO1001U</a> | 203,695 | 157,859 | 153,892 | 75.6 |
| <hr/>                    |         |                           |         |         |         |      |
| <b>Replicates</b>        | 0 - 5   | <a href="#">GFLMM00MU</a> | 146,180 | 105,252 | 103,542 | 70.8 |
|                          | 5 - 10  | <a href="#">GFLMM00MV</a> | 89,729  | 67,825  | 66,885  | 74.5 |
|                          | 10 - 20 | <a href="#">GFLMM00MW</a> | 212,668 | 177,132 | 172,813 | 81.3 |
|                          | 20 - 40 | <a href="#">GFLMM00MX</a> | 295,469 | 243,261 | 233,672 | 79.1 |
| <hr/>                    |         |                           |         |         |         |      |
| <b>Pan de Azúcar</b>     |         |                           |         |         |         |      |
|                          | 0 - 5   | <a href="#">GFLMM00B0</a> | 378,070 | 297,364 | 281,586 | 74.5 |
| <b>AZPED50</b>           | 5 - 10  | <a href="#">GFLMM00AJ</a> | 103,190 | 88,431  | 86,980  | 84.3 |
| (South-facing mid slope) | 10 - 20 | <a href="#">GFLMM00AH</a> | 494,245 | 447,348 | 405,476 | 82   |
|                          | 20 - 40 | <a href="#">GFLMM00AG</a> | 71,162  | 59,594  | 59,004  | 82.9 |
| <hr/>                    |         |                           |         |         |         |      |
| <b>Replicates</b>        | 0 - 5   | <a href="#">GFLMM00AF</a> | 409,029 | 369,969 | 367,185 | 89.8 |
|                          | 5 - 10  | <a href="#">GFLMM00AE</a> | 342,184 | 163,909 | 157,953 | 46.2 |
|                          | 10 - 20 | <a href="#">GFLMM00AD</a> | 410,477 | 368,846 | 354,279 | 86.3 |
|                          | 20 - 40 | <a href="#">GFLMM00AC</a> | 55,222  | 428,38  | 42,612  | 77.2 |
| <hr/>                    |         |                           |         |         |         |      |
| <b>Santa Gracia</b>      |         |                           |         |         |         |      |
|                          | 0 - 5   | <a href="#">GFLMM00BH</a> | 280,167 | 253,973 | 250,769 | 89.5 |
| <b>SGPED40</b>           | 5 - 10  | <a href="#">GFLMM00BJ</a> | 294,057 | 262,572 | 259,692 | 88.3 |
| (South-facing mid slope) | 10 - 20 | <a href="#">GFLMM00CU</a> | 434,551 | 392,896 | 386,827 | 89   |
|                          | 20 - 40 | <a href="#">GFLMM00CW</a> | 85,040  | 56,484  | 56,420  | 66.3 |
| <hr/>                    |         |                           |         |         |         |      |
| <b>Replicates</b>        | 0 - 5   | <a href="#">GFLMM009W</a> | 558,578 | 489,569 | 479,285 | 85.8 |
|                          | 5 - 10  | <a href="#">GFLMM009V</a> | 433,238 | 396,073 | 391,221 | 90.3 |
|                          | 10 - 20 | <a href="#">GFLMM009U</a> | 329,705 | 245,764 | 243,910 | 74   |
|                          | 20 - 40 | <a href="#">GFLMM009T</a> | 96,382  | 66,604  | 66,150  | 68.6 |
| <hr/>                    |         |                           |         |         |         |      |
| <b>La Campana</b>        |         |                           |         |         |         |      |
|                          | 0 - 5   | <a href="#">GFLMM00CJ</a> | 561,819 | 504,263 | 497,776 | 88.6 |
| <b>LCPED20</b>           | 5 - 10  | <a href="#">GFLMM00B4</a> | 315,879 | 275,404 | 274,034 | 86.8 |
|                          | 10 - 20 | <a href="#">GFLMM00CH</a> | 317,624 | 283,406 | 281,281 | 88.6 |

|                          |         |                           |         |         |         |      |
|--------------------------|---------|---------------------------|---------|---------|---------|------|
| (South-facing mid slope) | 20 - 40 | <a href="#">GFLMM00B3</a> | 177,313 | 130,598 | 129,995 | 73.3 |
| <b>Replicates</b>        | 0 - 5   | <a href="#">GFLMM00A3</a> | 638,016 | 562,127 | 554,849 | 87   |
|                          | 5 - 10  | <a href="#">GFLMM00A2</a> | 231,307 | 194,100 | 191,685 | 82.9 |
|                          | 10 - 20 | <a href="#">GFLMM00A1</a> | 650,913 | 588,247 | 580,984 | 89.3 |
|                          | 20 - 40 | <a href="#">GFLMM00A0</a> | 112,264 | 790,79  | 78,773  | 70.2 |
| <b>Nahuelbuta</b>        |         |                           |         |         |         |      |
|                          | 0 - 5   | <a href="#">GFLMM00BV</a> | 495,783 | 390,285 | 364,764 | 73.6 |
| <b>NAPED20</b>           | 5 - 10  | <a href="#">GFLMM00BW</a> | 525,175 | 470,781 | 463,539 | 88.3 |
| (South-facing mid slope) | 10 - 20 | <a href="#">GFLMM00BU</a> | 564,367 | 503,588 | 491,555 | 87.1 |
|                          | 20 - 40 | <a href="#">GFLMM00BT</a> | 186,354 | 148,884 | 146,770 | 78.8 |
| <b>Replicates</b>        | 0 - 5   | <a href="#">GFLMM001T</a> | 683,194 | 612,307 | 598,851 | 87.7 |
|                          | 5 - 10  | <a href="#">GFLMM001S</a> | 735,811 | 647,192 | 618,336 | 84   |
|                          | 10 - 20 | <a href="#">GFLMM001R</a> | 331,133 | 291,847 | 275,445 | 83.2 |
|                          | 20 - 40 | <a href="#">GFLMM001Q</a> | 170,633 | 138,681 | 137,590 | 80.6 |

**Table S3.** Pearson correlation of soil bacterial diversity and physicochemical parameters in the north and south-facing mid slope.

| Slope aspect       | Property                          | Sand    | Silt     | Clay     | BD       | pH       | Plant-available P | TOC      | Nt       | St      | C/N      | Fe <sub>ox</sub> /Fe <sub>d</sub> | Richness | Shannon (H) | Evenness |
|--------------------|-----------------------------------|---------|----------|----------|----------|----------|-------------------|----------|----------|---------|----------|-----------------------------------|----------|-------------|----------|
| North-facing slope | Sand                              |         | 2.95E-08 | 5.12E-10 | 1.89E-06 | 0.00796  | 0.03233           | 2.36E-05 | 0.00010  | 0.54284 | 0.01119  | 7.50E-05                          | 0.24233  | 0.33734     | 0.24172  |
|                    | Silt                              | -0.8042 |          | 0.03315  | 6.75E-07 | 0.03079  | 0.04956           | 0.00012  | 0.00049  | 0.75470 | 0.00414  | 0.00681                           | 0.84395  | 0.93969     | 0.35705  |
|                    | Clay                              | -0.8540 | 0.3775   |          | 0.00452  | 0.03055  | 0.11598           | 0.00347  | 0.00476  | 0.49541 | 0.13927  | 0.00031                           | 0.04148  | 0.15003     | 0.31231  |
|                    | BD                                | 0.7493  | -0.7694  | -0.5040  |          | 0.01612  | 0.00175           | 1.18E-09 | 2.73E-09 | 0.78272 | 0.00042  | 1.05E-05                          | 0.16224  | 0.21171     | 0.28541  |
|                    | pH                                | 0.4608  | -0.3824  | -0.3829  | 0.4356   |          | 0.59326           | 1.57E-05 | 1.29E-06 | 0.00039 | 6.98E-07 | 3.75E-07                          | 0.02715  | 0.00056     | 0.00262  |
|                    | Plant-available P                 | 0.3792  | -0.3500  | -0.2834  | 0.5473   | -0.0981  |                   | 0.04927  | 0.11257  | 0.17384 | 0.67036  | 0.57352                           | 0.03349  | 0.01460     | 0.05113  |
|                    | TOC                               | -0.6738 | 0.6269   | 0.5013   | -0.8596  | -0.6844  | -0.3504           |          | 1.12E-14 | 0.09396 | 1.02E-09 | 1.03E-07                          | 0.86932  | 0.42626     | 0.34789  |
|                    | N <sub>t</sub>                    | -0.6501 | 0.5972   | 0.5014   | -0.8656  | -0.7570  | -0.2958           | 0.9408   |          | 0.05597 | 1.29E-06 | 2.44E-09                          | 0.90706  | 0.32503     | 0.21899  |
|                    | S <sub>t</sub>                    | -0.1156 | 0.0595   | 0.1294   | 0.0546   | 0.6060   | -0.2550           | -0.3114  | -0.3526  |         | 0.00948  | 0.01259                           | 0.00148  | 7.86E-07    | 0.00017  |
|                    | C/N                               | -0.4567 | 0.5082   | 0.2764   | -0.6213  | -0.7687  | -0.0810           | 0.8611   | 0.7569   | -0.4658 |          | 0.00014                           | 0.03357  | 0.00802     | 0.02263  |
|                    | Fe <sub>ox</sub> /Fe <sub>d</sub> | -0.6590 | 0.4834   | 0.6141   | -0.7299  | -0.7800  | -0.1070           | 0.8015   | 0.8515   | -0.4500 | 0.6401   |                                   | 0.79906  | 0.22861     | 0.26842  |
|                    | Richness                          | 0.2128  | 0.0362   | -0.3625  | 0.2618   | -0.3904  | 0.3769            | 0.0303   | 0.0223   | -0.5544 | 0.3891   | 0.0485                            |          | 3.97E-12    | 0.00095  |
|                    | Shannon (H)                       | 0.1753  | -0.0139  | -0.2604  | 0.2348   | -0.5764  | 0.4278            | 0.1457   | 0.1860   | -0.7665 | 0.4748   | 0.2266                            | 0.8965   |             | 6.38E-09 |
|                    | Evenness                          | 0.2130  | -0.1683  | -0.1844  | 0.2016   | -0.5140  | 0.3478            | 0.1715   | 0.2312   | -0.6340 | 0.4149   | 0.2087                            | 0.5563   | 0.8249      |          |
| South-facing slope | Sand                              |         | 3.33E-09 | 3.20E-18 | 4.49E-06 | 0.00085  | 0.0139            | 1.57E-06 | 0.00156  | 0.3899  | 1.86E-07 | 0.39085                           | 0.86394  | 0.90989     | 0.63512  |
|                    | Silt                              | -0.8479 |          | 2.88E-05 | 0.00496  | 0.22103  | 0.0986            | 0.00704  | 0.00197  | 0.3084  | 4.81E-05 | 0.63610                           | 0.93116  | 0.59250     | 0.38461  |
|                    | Clay                              | -0.9673 | 0.6858   |          | 9.03E-07 | 3.45E-05 | 0.0100            | 9.21E-08 | 0.00249  | 0.4500  | 8.16E-08 | 0.33046                           | 0.78489  | 0.92488     | 0.80836  |
|                    | BD                                | 0.7492  | -0.5158  | -0.7817  |          | 6.74E-07 | 0.0203            | 1.54E-08 | 1.35E-08 | 0.0629  | 1.39E-04 | 0.73354                           | 0.02080  | 0.09278     | 0.68480  |
|                    | pH                                | 0.5768  | -0.2302  | -0.6809  | 0.7871   |          | 0.6597            | 1.03E-06 | 0.00055  | 0.0055  | 1.22E-08 | 0.07492                           | 0.00456  | 0.00020     | 0.00174  |
|                    | Plant-available P                 | 0.4442  | -0.3073  | -0.4629  | 0.4362   | 0.0838   |                   | 0.14337  | 0.18551  | 0.4796  | 0.33048  | 0.03535                           | 0.19607  | 0.05745     | 0.05765  |
|                    | TOC                               | -0.7530 | 0.4817   | 0.8032   | -0.8451  | -0.7613  | -0.2737           |          | 4.98E-08 | 0.2306  | 2.56E-08 | 0.07286                           | 0.00500  | 0.04980     | 0.28518  |
|                    | N <sub>t</sub>                    | -0.5695 | 0.5593   | 0.5489   | -0.8635  | -0.6110  | -0.2577           | 0.8292   |          | 0.1531  | 5.51E-03 | 0.45461                           | 0.00012  | 0.02064     | 0.17763  |
|                    | S <sub>t</sub>                    | 0.1690  | -0.1996  | -0.1488  | 0.3700   | 0.5105   | -0.1393           | -0.2341  | -0.2773  |         | 0.15602  | 0.12133                           | 0.01771  | 0.01075     | 0.10605  |
|                    | C/N                               | -0.8092 | 0.6903   | 0.8220   | -0.6784  | -0.8480  | -0.1909           | 0.8384   | 0.5105   | -0.2754 |          | 0.00906                           | 0.15476  | 6.01E-02    | 0.11351  |
|                    | Fe <sub>ox</sub> /Fe <sub>d</sub> | -0.1756 | 0.0974   | 0.1987   | 0.0733   | -0.3553  | 0.4143            | 0.3576   | 0.1533   | -0.3115 | 0.5014   |                                   | 0.22820  | 0.01653     | 0.01255  |
|                    | Richness                          | -0.0327 | -0.0165  | 0.0520   | -0.4347  | -0.5035  | 0.2428            | 0.4841   | 0.6637   | -0.4448 | 0.2762   | 0.2447                            |          | 7.32E-09    | 0.00033  |
|                    | Shannon (H)                       | 0.0216  | -0.1018  | 0.0180   | -0.3238  | -0.6285  | 0.3507            | 0.3497   | 0.4352   | -0.4744 | 0.3597   | 0.4656                            | 0.8232   |             | 1.22E-14 |
|                    | Evenness                          | 0.0903  | -0.1647  | -0.0462  | -0.0802  | -0.5476  | 0.3504            | 0.1949   | 0.2622   | -0.3120 | 0.3058   | 0.4825                            | 0.5945   | 0.9307      |          |

**Table S4.** Relative abundances in % of dominant bacterial phyla obtained in the four climate regions and four depths. Community composition was studied in biological duplicates, based on Illumina HiSeq amplicon sequencing.

| Study site                  | Depth<br>[cm] | IGSN                      | <i>Acidobacteria</i> | <i>Actinobacteria</i> | <i>Chloroflexi</i> | <i>Gemmatimonadetes</i><br>[Relative abundance %] | <i>Planctomycetes</i> | <i>Proteobacteria</i> | <i>Verrucomicrobia</i> |
|-----------------------------|---------------|---------------------------|----------------------|-----------------------|--------------------|---------------------------------------------------|-----------------------|-----------------------|------------------------|
| <b>Pan de Azúcar</b>        |               |                           |                      |                       |                    |                                                   |                       |                       |                        |
|                             | 0 - 5         | <a href="#">GFRO100UD</a> | 1.8                  | 54.1                  | 12.0               | 6.1                                               | 1.5                   | 16.7                  | 1.1                    |
| <b>AZPED21</b>              | 5 - 10        | <a href="#">GFRO100UE</a> | 2.9                  | 51.3                  | 5.4                | 8.1                                               | 3.1                   | 17.4                  | 1.4                    |
| (North-facing mid<br>slope) | 10 - 20       | <a href="#">GFRO100UF</a> | 1.0                  | 41.3                  | 3.2                | 12.1                                              | 4.4                   | 17.1                  | 0.7                    |
|                             | 20 - 40       | <a href="#">GFRO100UG</a> | 2.4                  | 46.0                  | 4.5                | 7.2                                               | 1.1                   | 15.9                  | 0.7                    |
| <b>Replicates</b>           | 0 - 5         | <a href="#">GFLMM00LP</a> | 7.3                  | 32.1                  | 18.7               | 3.4                                               | 9.2                   | 10.8                  | 7.5                    |
|                             | 5 - 10        | <a href="#">GFLMM00NW</a> | 2.8                  | 55.0                  | 9.3                | 10.0                                              | 1.2                   | 13.7                  | 0.6                    |
|                             | 10 - 20       | <a href="#">GFLMM00NX</a> | 1.9                  | 62.2                  | 8.2                | 12.5                                              | 0.4                   | 9.9                   | 0.6                    |
|                             | 20 - 40       | <a href="#">GFLMM00NY</a> | 5.2                  | 37.3                  | 6.6                | 1.2                                               | 4.1                   | 21.8                  | 3.7                    |
| <b>Santa Gracia</b>         |               |                           |                      |                       |                    |                                                   |                       |                       |                        |
|                             | 0 - 5         | <a href="#">GFRO100VF</a> | 8.0                  | 42.5                  | 11.0               | 5.0                                               | 5.9                   | 17.1                  | 2.8                    |
| <b>SGPED70</b>              | 5 - 10        | <a href="#">GFRO100VG</a> | 14.2                 | 29.3                  | 13.2               | 3.4                                               | 6.8                   | 17.7                  | 7.7                    |
| (North-facing mid<br>slope) | 10 - 20       | <a href="#">GFRO100VH</a> | 8.6                  | 40.8                  | 9.1                | 4.6                                               | 3.7                   | 19.2                  | 4.8                    |
|                             | 20 - 40       | <a href="#">GFRO100VJ</a> | 10.3                 | 42.6                  | 10.2               | 2.8                                               | 4.7                   | 13.1                  | 7.2                    |
| <b>Replicates</b>           | 0 - 5         | <a href="#">GFLMM00NS</a> | 3.5                  | 27.2                  | 9.8                | 4.0                                               | 3.8                   | 29.5                  | 2.4                    |
|                             | 5 - 10        | <a href="#">GFLMM00NT</a> | 9.9                  | 36.2                  | 10.2               | 10.6                                              | 1.7                   | 19.4                  | 3.0                    |
|                             | 10 - 20       | <a href="#">GFLMM00NU</a> | 18.7                 | 27.3                  | 9.2                | 4.3                                               | 6.7                   | 14.5                  | 10.9                   |
|                             | 20 - 40       | <a href="#">GFLMM00NV</a> | 11.7                 | 35.3                  | 10.7               | 2.3                                               | 6.1                   | 11.6                  | 13.0                   |
| <b>La Campana</b>           |               |                           |                      |                       |                    |                                                   |                       |                       |                        |
|                             | 0 - 5         | <a href="#">GFRO1002V</a> | 16.0                 | 23.8                  | 5.1                | 1.8                                               | 6.3                   | 33.9                  | 5.2                    |
| <b>LCPED40</b>              | 5 - 10        | <a href="#">GFRO1002W</a> | 13.8                 | 27.1                  | 6.8                | 3.5                                               | 5.2                   | 29.0                  | 5.4                    |
| (North-facing mid<br>slope) | 10 - 20       | <a href="#">GFRO1002X</a> | 18.4                 | 23.9                  | 9.1                | 3.3                                               | 8.4                   | 20.4                  | 7.8                    |
|                             | 20 - 40       | <a href="#">GFRO1002Y</a> | 17.7                 | 24.1                  | 8.5                | 3.7                                               | 7.6                   | 18.3                  | 10.9                   |
| <b>Replicates</b>           | 0 - 5         | <a href="#">GFLMM00NA</a> | 18.4                 | 19.2                  | 7.9                | 2.2                                               | 13.6                  | 25.4                  | 5.0                    |
|                             | 5 - 10        | <a href="#">GFLMM00NB</a> | 14.8                 | 21.7                  | 8.6                | 4.5                                               | 6.5                   | 27.9                  | 6.5                    |
|                             | 10 - 20       | <a href="#">GFLMM00NC</a> | 18.4                 | 18.8                  | 10.7               | 3.1                                               | 9.9                   | 20.5                  | 10.0                   |
|                             | 20 - 40       | <a href="#">GFLMM00ND</a> | 17.3                 | 21.5                  | 8.5                | 4.8                                               | 7.9                   | 16.2                  | 12.4                   |
| <b>Nahuelbuta</b>           |               |                           |                      |                       |                    |                                                   |                       |                       |                        |
|                             | 0 - 5         | <a href="#">GFRO1001R</a> | 14.7                 | 13.9                  | 13.1               | 1.1                                               | 10.0                  | 26.7                  | 17.5                   |
| <b>NAPED40</b>              | 5 - 10        | <a href="#">GFRO1001S</a> | 12.2                 | 14.9                  | 17.5               | 1.0                                               | 4.5                   | 33.2                  | 11.9                   |
|                             | 10 - 20       | <a href="#">GFRO1001T</a> | 15.6                 | 9.1                   | 25.3               | 0.7                                               | 7.3                   | 22.7                  | 14.6                   |



|                                            |         |                           |      |      |      |      |      |      |      |
|--------------------------------------------|---------|---------------------------|------|------|------|------|------|------|------|
| (North-facing mid slope)                   | 20 - 40 | <a href="#">GFRO1001U</a> | 16.8 | 5.4  | 38.2 | 1.6  | 3.4  | 13.2 | 7.8  |
| <b>Replicates</b>                          | 0 - 5   | <a href="#">GFLMM00MU</a> | 16.0 | 9.1  | 21.0 | 1.4  | 11.4 | 23.6 | 7.8  |
|                                            | 5 - 10  | <a href="#">GFLMM00MV</a> | 19.3 | 6.7  | 19.6 | 0.6  | 13.8 | 25.6 | 9.1  |
|                                            | 10 - 20 | <a href="#">GFLMM00MW</a> | 16.6 | 10.3 | 17.8 | 0.9  | 5.8  | 36.5 | 6.9  |
|                                            | 20 - 40 | <a href="#">GFLMM00MX</a> | 13.8 | 12.6 | 20.2 | 1.3  | 8.0  | 30.2 | 9.0  |
| <b>Pan de Azúcar</b>                       |         |                           |      |      |      |      |      |      |      |
| <b>AZPED50</b><br>(South-facing mid slope) | 0 - 5   | <a href="#">GFLMM00B0</a> | 1.5  | 33.5 | 14.9 | 9.4  | 13.8 | 15.5 | 0.7  |
|                                            | 5 - 10  | <a href="#">GFLMM00AJ</a> | 1.2  | 54.4 | 2.6  | 15.1 | 6.1  | 8.0  | 0.5  |
|                                            | 10 - 20 | <a href="#">GFLMM00AH</a> | 0.9  | 72.8 | 0.9  | 3.3  | 2.0  | 8.5  | 0.5  |
|                                            | 20 - 40 | <a href="#">GFLMM00AG</a> | 1.1  | 35.3 | 5.7  | 11.4 | 7.2  | 24.0 | 0.4  |
| <b>Replicates</b>                          | 0 - 5   | <a href="#">GFLMM00AF</a> | 1.0  | 46.1 | 12.7 | 21.2 | 2.4  | 9.0  | 0.1  |
|                                            | 5 - 10  | <a href="#">GFLMM00AE</a> | 0.8  | 54.8 | 3.9  | 14.8 | 4.9  | 10.5 | 0.8  |
|                                            | 10 - 20 | <a href="#">GFLMM00AD</a> | 1.0  | 73.2 | 1.4  | 3.6  | 0.3  | 10.5 | 0.2  |
|                                            | 20 - 40 | <a href="#">GFLMM00AC</a> | 1.7  | 27.8 | 0.3  | 0.5  | 1.9  | 34.7 | 0.6  |
| <b>Santa Gracia</b>                        |         |                           |      |      |      |      |      |      |      |
| <b>SGPED40</b><br>(South-facing mid slope) | 0 - 5   | <a href="#">GFLMM00BH</a> | 11.9 | 37.0 | 6.4  | 3.5  | 7.7  | 21.0 | 3.2  |
|                                            | 5 - 10  | <a href="#">GFLMM00BJ</a> | 9.7  | 38.8 | 7.9  | 5.7  | 2.6  | 23.3 | 3.1  |
|                                            | 10 - 20 | <a href="#">GFLMM00CU</a> | 19.5 | 32.5 | 6.8  | 3.4  | 8.2  | 16.3 | 7.5  |
|                                            | 20 - 40 | <a href="#">GFLMM00CW</a> | 20.6 | 31.8 | 7.5  | 2.6  | 5.5  | 12.4 | 13.1 |
| <b>Replicates</b>                          | 0 - 5   | <a href="#">GFLMM009W</a> | 7.2  | 31.0 | 5.8  | 4.4  | 3.3  | 25.6 | 2.1  |
|                                            | 5 - 10  | <a href="#">GFLMM009V</a> | 22.9 | 32.8 | 6.3  | 3.1  | 6.0  | 12.6 | 8.6  |
|                                            | 10 - 20 | <a href="#">GFLMM009U</a> | 18.5 | 37.3 | 7.0  | 3.2  | 6.0  | 11.5 | 8.5  |
|                                            | 20 - 40 | <a href="#">GFLMM009T</a> | 18.7 | 43.3 | 3.6  | 2.6  | 4.7  | 14.2 | 7.6  |
| <b>La Campana</b>                          |         |                           |      |      |      |      |      |      |      |
| <b>LCPED20</b><br>(South-facing mid slope) | 0 - 5   | <a href="#">GFLMM00CJ</a> | 23.4 | 20.8 | 5.2  | 2.6  | 12.0 | 19.2 | 9.7  |
|                                            | 5 - 10  | <a href="#">GFLMM00B4</a> | 18.0 | 28.9 | 5.9  | 1.7  | 5.3  | 23.5 | 8.0  |
|                                            | 10 - 20 | <a href="#">GFLMM00CH</a> | 14.7 | 25.1 | 10.2 | 4.8  | 4.5  | 21.5 | 11.3 |
|                                            | 20 - 40 | <a href="#">GFLMM00B3</a> | 17.7 | 19.7 | 6.3  | 4.9  | 6.2  | 18.6 | 16.7 |
| <b>Replicates</b>                          | 0 - 5   | <a href="#">GFLMM00A3</a> | 20.2 | 29.3 | 4.0  | 2.5  | 9.1  | 21.5 | 7.4  |
|                                            | 5 - 10  | <a href="#">GFLMM00A2</a> | 11.3 | 37.1 | 5.0  | 4.0  | 3.0  | 24.3 | 6.5  |
|                                            | 10 - 20 | <a href="#">GFLMM00A1</a> | 20.4 | 24.8 | 6.0  | 4.1  | 7.3  | 16.3 | 12.0 |
|                                            | 20 - 40 | <a href="#">GFLMM00A0</a> | 21.3 | 21.1 | 6.7  | 5.7  | 6.3  | 17.0 | 11.5 |
| <b>Nahuelbuta</b>                          |         |                           |      |      |      |      |      |      |      |
|                                            | 0 - 5   | <a href="#">GFLMM00BV</a> | 20.5 | 18.7 | 4.0  | 0.7  | 10.3 | 33.0 | 7.9  |

|                          |         |                           |      |      |      |     |      |      |      |
|--------------------------|---------|---------------------------|------|------|------|-----|------|------|------|
| <i>NAPED20</i>           | 5 - 10  | <a href="#">GFLMM00BW</a> | 26.8 | 13.5 | 5.7  | 1.0 | 10.4 | 26.5 | 11.4 |
| (South-facing mid slope) | 10 - 20 | <a href="#">GFLMM00BU</a> | 29.2 | 11.5 | 11.0 | 0.6 | 5.9  | 32.1 | 6.0  |
|                          | 20 - 40 | <a href="#">GFLMM00BT</a> | 20.3 | 10.7 | 13.4 | 1.0 | 9.2  | 29.3 | 11.9 |
| <i>Replicates</i>        | 0 - 5   | <a href="#">GFLMM001T</a> | 21.9 | 18.6 | 9.2  | 1.5 | 7.5  | 30.4 | 5.9  |
|                          | 5 - 10  | <a href="#">GFLMM001S</a> | 22.4 | 15.6 | 13.8 | 0.7 | 9.4  | 28.8 | 6.1  |
|                          | 10 - 20 | <a href="#">GFLMM001R</a> | 18.3 | 16.6 | 16.0 | 0.7 | 3.5  | 37.5 | 4.3  |
|                          | 20 - 40 | <a href="#">GFLMM001Q</a> | 11.6 | 16.0 | 18.5 | 3.1 | 3.1  | 37.0 | 3.3  |

---

**Table S5.** Results of PERMANOVA analysis using adonis function to compare bacterial community composition between sites and slope aspects.

|              | Df | SumsOfSqs | R2      | F      | Pr(>F)   |
|--------------|----|-----------|---------|--------|----------|
| Site         | 3  | 6.8837    | 0.27332 | 7.5223 | 0.001*** |
| Slope aspect | 7  | 9.5636    | 0.37972 | 4.8974 | 0.001*** |

Signif. codes: 0 '\*\*\*' 0.001 '\*\*' 0.01 '\*' 0.05 '.' 0.1 ' ' 1

**Table S6.** Results of PERMANOVA analysis using pairwise adonis test based on Bray-Curtis distances with 999 permutations for comparing bacterial community composition between sites and slope aspects (north and south-facing mid slope).

| Comparison   | Pairs            | Df | SumsOfSqs | F.model   | R2        | p.value | p.adjusted sig |
|--------------|------------------|----|-----------|-----------|-----------|---------|----------------|
| Site         | AZ vs SG         | 1  | 1.743065  | 4.694124  | 0.1353002 | 0.001   | 0.006 *        |
|              | AZ vs LC         | 1  | 2.09087   | 6.098381  | 0.1689378 | 0.001   | 0.006 *        |
|              | AZ vs NA         | 1  | 2.591955  | 8.361754  | 0.2179711 | 0.001   | 0.006 *        |
|              | SG vs LC         | 1  | 1.268199  | 4.225949  | 0.1234721 | 0.001   | 0.006 *        |
|              | SG vs NA         | 1  | 3.113795  | 11.6526   | 0.2797568 | 0.001   | 0.006 *        |
|              | LC vs NA         | 1  | 2.95958   | 12.396332 | 0.2923916 | 0.001   | 0.006 *        |
| Slope aspect | AZ-NFS vs AZ-SFS | 1  | 0.6696527 | 1.691756  | 0.1078118 | 0.013   | 0.364          |
|              | SG-NFS vs SG-SFS | 1  | 0.6604451 | 2.16635   | 0.1340037 | 0.006   | 0.168          |
|              | LC-NFS vs LC-SFS | 1  | 0.6943934 | 2.876193  | 0.170429  | 0.001   | 0.028 *        |
|              | NA-NFS vs NA-SFS | 1  | 0.6553783 | 3.771761  | 0.2122334 | 0.001   | 0.028 *        |

Signif. codes: 0 '\*\*\*' 0.001 '\*\*' 0.01 '\*' 0.05 '.' 0.1 ' ' 1

**Table S7.** Indicator-value analysis (or IndVal) of bacterial specialists identified in the north and south-facing mid slope. D represents 4 depth profiles – corresponding to D1 (0–5 cm), D2 (5–10 cm), D3 (10–20 cm), and D4 (20–40 cm). Taxa are shown on the level of (c) class, (o) order, (f) family, and (g) genus.

| Slope aspect       | ASV       | Taxa                                                      | Site/depth | Indicator value | <i>p</i> -value |
|--------------------|-----------|-----------------------------------------------------------|------------|-----------------|-----------------|
| North-facing slope | ASV_00237 | (p) <i>Acidobacteria</i> (c) Subgroup 6                   | LC         | 0.891061        | 0.001           |
|                    | ASV_00278 | (p) <i>Acidobacteria</i> (c) Subgroup 6                   | NA         | 0.978308        | 0.001           |
|                    | ASV_00048 | (p) <i>Acidobacteria</i> (g) <i>Candidatus Solibacter</i> | NA         | 0.860215        | 0.001           |
|                    | ASV_00104 | (p) <i>Acidobacteria</i> (g) RB41                         | LC         | 0.905058        | 0.001           |
|                    | ASV_00162 | (p) <i>Acidobacteria</i> (o) <i>Acidobacteriales</i>      | NA         | 0.918919        | 0.001           |
|                    | ASV_00223 | (p) <i>Acidobacteria</i> (o) <i>Acidobacteriales</i>      | NA         | 0.978041        | 0.001           |
|                    | ASV_00286 | (p) <i>Acidobacteria</i> (o) <i>Acidobacteriales</i>      | NA         | 0.928863        | 0.001           |
|                    | ASV_00035 | (p) <i>Acidobacteria</i> (o) Subgroup 2                   | NA         | 0.881072        | 0.001           |
|                    | ASV_00090 | (p) <i>Acidobacteria</i> (o) Subgroup 2                   | NA         | 0.875321        | 0.001           |
|                    | ASV_00629 | (p) <i>Acidobacteria</i> (o) Subgroup 7                   | NA         | 0.882803        | 0.001           |
|                    | ASV_01767 | (p) <i>Acidobacteria</i> (o) Subgroup 7                   | AZ-D4      | 0.966972        | 0.036           |
|                    | ASV_01273 | (p) <i>Actinobacteria</i> (c) <i>Acidimicrobiia</i>       | SG         | 0.875912        | 0.001           |
|                    | ASV_00073 | (p) <i>Actinobacteria</i> (f) 67-14                       | AZ-D1      | 0.995273        | 0.031           |
|                    | ASV_00133 | (p) <i>Actinobacteria</i> (f) 67-14                       | AZ-D1      | 0.936084        | 0.029           |
|                    | ASV_00179 | (p) <i>Actinobacteria</i> (f) 67-14                       | AZ-D1      | 0.971496        | 0.035           |
|                    | ASV_00228 | (p) <i>Actinobacteria</i> (f) 67-14                       | LC         | 0.931961        | 0.001           |
|                    | ASV_00168 | (p) <i>Actinobacteria</i> (f) <i>Nitriliruptoraceae</i>   | AZ         | 0.814757        | 0.005           |
|                    | ASV_00394 | (p) <i>Actinobacteria</i> (g) <i>Amycolatopsis</i>        | SG         | 0.858166        | 0.001           |
|                    | ASV_00087 | (p) <i>Actinobacteria</i> (g) <i>Conexibacter</i>         | NA         | 0.908696        | 0.001           |
|                    | ASV_00263 | (p) <i>Actinobacteria</i> (g) <i>Conexibacter</i>         | AZ-D1      | 0.981436        | 0.033           |
|                    | ASV_00016 | (p) <i>Actinobacteria</i> (g) <i>Cutibacterium</i>        | AZ         | 0.803121        | 0.042           |
|                    | ASV_00342 | (p) <i>Actinobacteria</i> (g) <i>Gaiella</i>              | LC         | 0.83559         | 0.001           |
|                    | ASV_00349 | (p) <i>Actinobacteria</i> (g) <i>Mycobacterium</i>        | NA         | 0.958801        | 0.001           |
|                    | ASV_00346 | (p) <i>Actinobacteria</i> (g) <i>Rubrobacter</i>          | AZ-D1      | 0.949301        | 0.025           |

|           |                                                          |       |          |       |
|-----------|----------------------------------------------------------|-------|----------|-------|
| ASV_01240 | (p) <i>Actinobacteria</i> (g) <i>Rubrobacter</i>         | SG    | 1        | 0.001 |
| ASV_00783 | (p) <i>Actinobacteria</i> (o) <i>Gaiellales</i>          | SG    | 0.861111 | 0.001 |
| ASV_00078 | (p) <i>Actinobacteria</i> (o) IMCC26256                  | NA    | 0.900643 | 0.001 |
| ASV_00009 | (p) <i>Chloroflexi</i> (c) AD3                           | NA    | 0.81335  | 0.001 |
| ASV_00049 | (p) <i>Chloroflexi</i> (c) AD3                           | NA    | 0.882872 | 0.001 |
| ASV_00128 | (p) <i>Chloroflexi</i> (c) AD3                           | NA    | 0.969988 | 0.001 |
| ASV_00387 | (p) <i>Chloroflexi</i> (c) AD3                           | NA    | 0.885714 | 0.001 |
| ASV_00481 | (p) <i>Chloroflexi</i> (c) AD3                           | NA    | 0.830674 | 0.001 |
| ASV_00207 | (p) <i>Chloroflexi</i> (c) TK10                          | NA    | 0.978667 | 0.001 |
| ASV_00234 | (p) <i>Chloroflexi</i> (c) TK10                          | NA    | 0.963082 | 0.001 |
| ASV_00127 | (p) <i>Chloroflexi</i> (f) JG30-KF-CM45                  | AZ-D1 | 0.930275 | 0.032 |
| ASV_00294 | (p) <i>Chloroflexi</i> (g) HSB OF53-F07                  | NA    | 0.924911 | 0.001 |
| ASV_00365 | (p) <i>Chloroflexi</i> (g) HSB OF53-F07                  | NA    | 0.979742 | 0.001 |
| ASV_00401 | (p) <i>Chloroflexi</i> (g) JG30a-KF-32                   | NA    | 0.907552 | 0.001 |
| ASV_00941 | (p) <i>Chloroflexi</i> (g) JG30a-KF-32                   | NA    | 0.96875  | 0.001 |
| ASV_00196 | (p) <i>Chloroflexi</i> (o) C0119                         | SG    | 0.851693 | 0.002 |
| ASV_03747 | (p) <i>Firmicutes</i> (g) <i>Bacillus</i>                | AZ-D3 | 0.970817 | 0.03  |
| ASV_00007 | (p) <i>Firmicutes</i> (g) <i>Paenibacillus</i>           | AZ    | 0.860612 | 0.002 |
| ASV_00021 | (p) <i>Firmicutes</i> (g) <i>Staphylococcus</i>          | AZ    | 0.834679 | 0.001 |
| ASV_00447 | (p) GAL15 (p) GAL15                                      | NA    | 0.817383 | 0.004 |
| ASV_00416 | (p) <i>Gemmatimonadetes</i> (c) BD2-11 terrestrial group | AZ    | 0.831886 | 0.004 |
| ASV_01253 | (p) <i>Gemmatimonadetes</i> (c) BD2-11 terrestrial group | AZ-3  | 0.865734 | 0.039 |
| ASV_00121 | (p) <i>Planctomycetes</i> (f) <i>Gemmataceae</i>         | NA    | 0.830455 | 0.001 |
| ASV_00366 | (p) <i>Planctomycetes</i> (f) <i>Gemmataceae</i>         | NA    | 0.95734  | 0.001 |
| ASV_00082 | (p) <i>Proteobacteria</i> (f) A21b                       | NA    | 0.836321 | 0.001 |
| ASV_00903 | (p) <i>Proteobacteria</i> (f) <i>Rhizobiaceae</i>        | AZ-D4 | 0.954098 | 0.037 |
| ASV_00041 | (p) <i>Proteobacteria</i> (f) <i>Xanthobacteraceae</i>   | NA    | 0.871116 | 0.001 |

|                       |           |                                                                    |       |          |       |
|-----------------------|-----------|--------------------------------------------------------------------|-------|----------|-------|
|                       | ASV_00043 | (p) <i>Proteobacteria</i> (f) <i>Xanthobacteraceae</i>             | NA    | 0.802617 | 0.001 |
|                       | ASV_00124 | (p) <i>Proteobacteria</i> (g) <i>Acidibacter</i>                   | NA    | 0.81672  | 0.001 |
|                       | ASV_00221 | (p) <i>Proteobacteria</i> (g) <i>Methylobacterium</i>              | SG    | 0.811614 | 0.001 |
|                       | ASV_00295 | (p) <i>Proteobacteria</i> (g) <i>Rhodomicrobium</i>                | NA    | 0.875433 | 0.001 |
|                       | ASV_00150 | (p) <i>Proteobacteria</i> (g) <i>Sphingomonas</i>                  | AZ    | 0.918938 | 0.001 |
|                       | ASV_00034 | (p) <i>Proteobacteria</i> (o) <i>Elsterales</i>                    | NA    | 0.833123 | 0.001 |
|                       | ASV_00255 | (p) <i>Proteobacteria</i> (o) <i>Elsterales</i>                    | NA    | 0.839857 | 0.001 |
|                       | ASV_00703 | (p) <i>Proteobacteria</i> (o) <i>Elsterales</i>                    | NA    | 0.875    | 0.001 |
|                       | ASV_00044 | (p) <i>Proteobacteria</i> (o) <i>WD260</i>                         | NA    | 0.909756 | 0.001 |
|                       | ASV_00089 | (p) <i>Rokubacteria</i> (o) <i>Rokubacteriales</i>                 | NA    | 0.878492 | 0.001 |
|                       | ASV_00195 | (p) <i>Rokubacteria</i> (o) <i>Rokubacteriales</i>                 | LC-D4 | 0.807018 | 0.033 |
|                       | ASV_00302 | (p) <i>Rokubacteria</i> (o) <i>Rokubacteriales</i>                 | NA    | 0.815276 | 0.001 |
|                       | ASV_00188 | (p) <i>Verrucomicrobia</i> (g) <i>Candidatus Udaeobacter</i>       | AZ-D1 | 0.992701 | 0.028 |
|                       | ASV_00247 | (p) <i>Verrucomicrobia</i> (g) <i>Candidatus Udaeobacter</i>       | NA    | 0.809971 | 0.001 |
|                       | ASV_00406 | (p) <i>Verrucomicrobia</i> (g) <i>Candidatus Udaeobacter</i>       | NA    | 0.873901 | 0.001 |
|                       | ASV_01663 | (p) <i>Verrucomicrobia</i> (g) <i>Candidatus Udaeobacter</i>       | SG    | 1        | 0.001 |
|                       | ASV_00024 | (p) <i>Verrucomicrobia</i> (g) <i>Candidatus Xiphinematobacter</i> | NA    | 0.802878 | 0.001 |
|                       | ASV_00137 | (p) <i>Verrucomicrobia</i> (g) <i>Candidatus Xiphinematobacter</i> | NA    | 0.982554 | 0.001 |
|                       | ASV_00293 | (p) <i>Verrucomicrobia</i> (g) <i>Candidatus Xiphinematobacter</i> | NA    | 0.996894 | 0.001 |
|                       | ASV_00482 | (p) <i>Verrucomicrobia</i> (g) <i>Candidatus Xiphinematobacter</i> | NA    | 0.946367 | 0.002 |
|                       | ASV_00494 | (p) <i>Verrucomicrobia</i> (g) <i>Candidatus Xiphinematobacter</i> | NA    | 0.825428 | 0.001 |
|                       | ASV_00545 | (p) <i>Verrucomicrobia</i> (g) <i>Candidatus Xiphinematobacter</i> | NA    | 0.953912 | 0.001 |
| South-facing<br>slope | ASV_00278 | (p) <i>Acidobacteria</i> ; (c) <i>Subgroup 6</i>                   | NA    | 1.000    | 0.001 |
|                       | ASV_00096 | (p) <i>Acidobacteria</i> ; (g) <i>Bryobacter</i>                   | NA    | 0.857    | 0.001 |
|                       | ASV_00252 | (p) <i>Acidobacteria</i> ; (g) <i>Bryobacter</i>                   | NA    | 0.950    | 0.001 |
|                       | ASV_00048 | (p) <i>Acidobacteria</i> ; (g) <i>Candidatus Solibacter</i>        | NA    | 0.889    | 0.001 |
|                       | ASV_00235 | (p) <i>Acidobacteria</i> ; (g) <i>Candidatus Solibacter</i>        | NA    | 0.927    | 0.001 |

|           |                                                            |        |       |       |
|-----------|------------------------------------------------------------|--------|-------|-------|
| ASV_00027 | (p) <i>Acidobacteria</i> ; (g) <i>Granulicella</i>         | NA     | 0.932 | 0.001 |
| ASV_00028 | (p) <i>Acidobacteria</i> ; (g) <i>Granulicella</i>         | NA     | 0.855 | 0.001 |
| ASV_00060 | (p) <i>Acidobacteria</i> ; (g) <i>Granulicella</i>         | NA     | 0.848 | 0.001 |
| ASV_00011 | (p) <i>Acidobacteria</i> ; (g) RB41                        | SG     | 0.814 | 0.001 |
| ASV_00116 | (p) <i>Acidobacteria</i> ; (g) RB41                        | SG     | 0.862 | 0.001 |
| ASV_00039 | (p) <i>Acidobacteria</i> ; (o) <i>Acidobacteriales</i>     | NA     | 0.918 | 0.001 |
| ASV_00072 | (p) <i>Acidobacteria</i> ; (o) <i>Acidobacteriales</i>     | NA     | 0.868 | 0.001 |
| ASV_00162 | (p) <i>Acidobacteria</i> ; (o) <i>Acidobacteriales</i>     | NA     | 0.916 | 0.001 |
| ASV_00035 | (p) <i>Acidobacteria</i> ; (o) Subgroup 2                  | NA     | 0.946 | 0.001 |
| ASV_00058 | (p) <i>Acidobacteria</i> ; (o) Subgroup 2                  | NA     | 0.862 | 0.001 |
| ASV_00090 | (p) <i>Acidobacteria</i> ; (o) Subgroup 2                  | NA     | 0.996 | 0.001 |
| ASV_00123 | (p) <i>Acidobacteria</i> ; (o) Subgroup 2                  | NA     | 0.965 | 0.001 |
| ASV_00140 | (p) <i>Acidobacteria</i> ; (o) Subgroup 2                  | NA     | 0.941 | 0.001 |
| ASV_00222 | (p) <i>Acidobacteria</i> ; (o) Subgroup 2                  | NA     | 0.952 | 0.001 |
| ASV_00280 | (p) <i>Acidobacteria</i> ; (o) Subgroup 2                  | NA     | 0.859 | 0.001 |
| ASV_00320 | (p) <i>Acidobacteria</i> ; (o) Subgroup 2                  | NA     | 0.995 | 0.001 |
| ASV_00148 | (p) <i>Actinobacteria</i> ; (c) <i>Acidimicrobiia</i>      | NA     | 0.937 | 0.001 |
| ASV_00175 | (p) <i>Actinobacteria</i> ; (c) <i>Acidimicrobiia</i>      | NA     | 0.946 | 0.001 |
| ASV_00268 | (p) <i>Actinobacteria</i> ; (c) <i>Acidimicrobiia</i>      | AZ- D1 | 0.974 | 0.035 |
| ASV_00292 | (p) <i>Actinobacteria</i> ; (f) 67-14                      | LC     | 0.845 | 0.001 |
| ASV_00208 | (p) <i>Actinobacteria</i> ; (f) 67-14                      | SG     | 0.823 | 0.001 |
| ASV_00037 | (p) <i>Actinobacteria</i> ; (f) 67-14                      | AZ-D1  | 0.821 | 0.028 |
| ASV_00385 | (p) <i>Actinobacteria</i> ; (f) <i>Euzebyaceae</i>         | AZ-D2  | 0.882 | 0.045 |
| ASV_00627 | (p) <i>Actinobacteria</i> ; (f) <i>Nitriliruptoraceae</i>  | AZ-D2  | 0.981 | 0.033 |
| ASV_00113 | (p) <i>Actinobacteria</i> ; (f) <i>Thermomonosporaceae</i> | NA     | 0.952 | 0.002 |
| ASV_00002 | (p) <i>Actinobacteria</i> ; (f) <i>Thermomonosporaceae</i> | AZ-D3  | 0.865 | 0.033 |
| ASV_00272 | (p) <i>Actinobacteria</i> ; (g) <i>Acidothermus</i>        | NA     | 0.933 | 0.001 |
| ASV_00283 | (p) <i>Actinobacteria</i> ; (g) <i>Acidothermus</i>        | NA     | 0.930 | 0.001 |

|           |                                                         |       |       |       |
|-----------|---------------------------------------------------------|-------|-------|-------|
| ASV_00087 | (p) <i>Actinobacteria</i> ; (g) <i>Conexibacter</i>     | NA    | 0.901 | 0.001 |
| ASV_00010 | (p) <i>Actinobacteria</i> ; (g) <i>Conexibacter</i>     | AZ-D1 | 0.835 | 0.039 |
| ASV_00066 | (p) <i>Actinobacteria</i> ; (g) <i>Conexibacter</i>     | AZ    | 0.813 | 0.017 |
| ASV_00337 | (p) <i>Actinobacteria</i> ; (g) <i>Conexibacter</i>     | AZ-D2 | 0.980 | 0.025 |
| ASV_00497 | (p) <i>Actinobacteria</i> ; (g) <i>Conexibacter</i>     | AZ-D1 | 0.906 | 0.043 |
| ASV_00016 | (p) <i>Actinobacteria</i> ; (g) <i>Cutibacterium</i>    | AZ    | 0.859 | 0.001 |
| ASV_00166 | (p) <i>Actinobacteria</i> ; (g) <i>Rubrobacter</i>      | SG    | 0.801 | 0.001 |
| ASV_00180 | (p) <i>Actinobacteria</i> ; (g) <i>Rubrobacter</i>      | AZ-D3 | 0.835 | 0.029 |
| ASV_00386 | (p) <i>Actinobacteria</i> ; (o) <i>Gaiellales</i>       | LC    | 0.983 | 0.001 |
| ASV_00078 | (p) <i>Actinobacteria</i> ; (o) IMCC26256               | NA    | 0.913 | 0.001 |
| ASV_00253 | (p) <i>Actinobacteria</i> ; (o) IMCC26256               | NA    | 0.883 | 0.001 |
| ASV_00187 | (p) <i>Actinobacteria</i> ; (p) <i>Actinobacteria</i>   | AZ-D2 | 0.871 | 0.026 |
| ASV_00057 | (p) <i>Bacteroidetes</i> ; (f) <i>Chitinophagaceae</i>  | NA    | 0.908 | 0.001 |
| ASV_00420 | (p) <i>Bacteroidetes</i> ; (f) <i>Cyclobacteriaceae</i> | AZ    | 0.842 | 0.002 |
| ASV_00229 | (p) <i>Bacteroidetes</i> ; (f) <i>Rhodothermaceae</i>   | AZ-D1 | 0.863 | 0.045 |
| ASV_01688 | (p) <i>Bacteroidetes</i> ; (f) <i>Rhodothermaceae</i>   | AZ-D2 | 0.990 | 0.029 |
| ASV_00215 | (p) <i>Bacteroidetes</i> ; (g) <i>Segetibacter</i>      | SG-D1 | 0.915 | 0.026 |
| ASV_00009 | (p) <i>Chloroflexi</i> ; (c) AD3                        | NA    | 0.877 | 0.001 |
| ASV_00049 | (p) <i>Chloroflexi</i> ; (c) AD3                        | NA    | 0.866 | 0.001 |
| ASV_00128 | (p) <i>Chloroflexi</i> ; (c) AD3                        | NA    | 0.985 | 0.001 |
| ASV_00158 | (p) <i>Chloroflexi</i> ; (c) KD4-96                     | LC    | 0.824 | 0.001 |
| ASV_00234 | (p) <i>Chloroflexi</i> ; (c) TK10                       | NA    | 0.969 | 0.001 |
| ASV_00359 | (p) <i>Chloroflexi</i> ; (c) TK10                       | NA    | 0.855 | 0.001 |
| ASV_00856 | (p) <i>Chloroflexi</i> ; (f) AKYG1722                   | AZ-D2 | 0.847 | 0.031 |
| ASV_00093 | (p) <i>Chloroflexi</i> ; (f) <i>Caldilineaceae</i>      | AZ-D1 | 0.977 | 0.036 |
| ASV_00194 | (p) <i>Chloroflexi</i> ; (f) <i>Ktedonobacteraceae</i>  | NA    | 0.907 | 0.001 |
| ASV_00139 | (p) <i>Chloroflexi</i> ; (g) HSB OF53-F07               | NA    | 0.893 | 0.001 |
| ASV_00231 | (p) <i>Chloroflexi</i> ; (g) HSB OF53-F07               | NA    | 0.967 | 0.001 |



|           |                                                                    |       |       |       |
|-----------|--------------------------------------------------------------------|-------|-------|-------|
| ASV_00111 | (p) Firmicutes; (g) <i>Anoxybacillus</i>                           | AZ-D4 | 0.937 | 0.024 |
| ASV_00021 | (p) Firmicutes; (g) <i>Staphylococcus</i>                          | AZ    | 0.827 | 0.004 |
| ASV_00520 | (p) Gemmatimonadetes; (c) BD2-11 terrestrial group                 | AZ-D2 | 0.922 | 0.035 |
| ASV_00109 | (p) Gemmatimonadetes; (c) S0134 terrestrial group                  | AZ-D2 | 0.858 | 0.037 |
| ASV_00454 | (p) Gemmatimonadetes; (c) S0134 terrestrial group                  | AZ-D2 | 0.990 | 0.031 |
| ASV_00178 | (p) Gemmatimonadetes; (f) Gemmatimonadaceae                        | LC    | 0.957 | 0.001 |
| ASV_00241 | (p) Gemmatimonadetes; (f) Gemmatimonadaceae                        | LC    | 0.971 | 0.001 |
| ASV_00186 | (p) Gemmatimonadetes; (f) Longimicrobiaceae                        | AZ-D1 | 0.975 | 0.036 |
| ASV_00264 | (p) Gemmatimonadetes; (f) Longimicrobiaceae                        | AZ-D1 | 0.956 | 0.034 |
| ASV_00121 | (p) Planctomycetes; (f) Gemmataceae                                | NA    | 0.911 | 0.001 |
| ASV_01153 | (p) Planctomycetes; (g) Rhodopirellula                             | AZ-D2 | 0.944 | 0.037 |
| ASV_00160 | (p) Planctomycetes; (g) Singulisphaera                             | NA    | 0.904 | 0.001 |
| ASV_00271 | (p) Planctomycetes; (o) Planctomycetales                           | NA    | 0.876 | 0.001 |
| ASV_00206 | (p) Proteobacteria; (c) Alphaproteobacteria                        | NA    | 0.898 | 0.001 |
| ASV_00082 | (p) Proteobacteria; (f) A21b                                       | NA    | 0.881 | 0.001 |
| ASV_00041 | (p) Proteobacteria; (f) Xanthobacteraceae                          | NA    | 0.958 | 0.001 |
| ASV_00059 | (p) Proteobacteria; (f) Xanthobacteraceae                          | NA    | 0.929 | 0.001 |
| ASV_00114 | (p) Proteobacteria; (f) Xanthobacteraceae                          | NA    | 0.959 | 0.001 |
| ASV_00316 | (p) Proteobacteria; (f) Xanthobacteraceae                          | NA    | 0.988 | 0.001 |
| ASV_00163 | (p) Proteobacteria; (g) Acidibacter                                | NA    | 0.921 | 0.001 |
| ASV_00282 | (p) Proteobacteria; (g) Burkholderia-Caballeronia-Paraburkholderia | NA    | 0.818 | 0.001 |
| ASV_00338 | (p) Proteobacteria; (g) Burkholderia-Caballeronia-Paraburkholderia | NA    | 0.886 | 0.001 |
| ASV_00006 | (p) Proteobacteria; (g) Pelomonas                                  | AZ-D4 | 0.808 | 0.036 |
| ASV_00001 | (p) Proteobacteria; (g) Ralstonia                                  | AZ    | 0.822 | 0.002 |
| ASV_00106 | (p) Proteobacteria; (g) Reyranella                                 | NA    | 0.919 | 0.001 |
| ASV_00200 | (p) Proteobacteria; (g) Reyranella                                 | NA    | 0.913 | 0.001 |
| ASV_00176 | (p) Proteobacteria; (g) Roseiarcus                                 | NA    | 0.863 | 0.001 |
| ASV_00150 | (p) Proteobacteria; (g) Sphingomonas                               | AZ    | 0.827 | 0.006 |

|           |                                                                      |    |       |       |
|-----------|----------------------------------------------------------------------|----|-------|-------|
| ASV_00014 | (p) <i>Proteobacteria</i> ; (o) <i>Elsterales</i>                    | NA | 0.813 | 0.001 |
| ASV_00034 | (p) <i>Proteobacteria</i> ; (o) <i>Elsterales</i>                    | NA | 0.919 | 0.001 |
| ASV_00076 | (p) <i>Proteobacteria</i> ; (o) <i>Elsterales</i>                    | NA | 0.939 | 0.001 |
| ASV_00203 | (p) <i>Proteobacteria</i> ; (o) <i>RCP2-54</i>                       | NA | 0.899 | 0.001 |
| ASV_00044 | (p) <i>Proteobacteria</i> ; (o) <i>WD260</i>                         | NA | 0.923 | 0.001 |
| ASV_00047 | (p) <i>Proteobacteria</i> ; (o) <i>WD260</i>                         | NA | 0.908 | 0.001 |
| ASV_00307 | (p) <i>Proteobacteria</i> ; (o) <i>WD260</i>                         | NA | 0.912 | 0.001 |
| ASV_00102 | (p) <i>Proteobacteria</i> ; (f) <i>Xanthobacteraceae</i>             | LC | 0.904 | 0.001 |
| ASV_00219 | (p) <i>Verrucomicrobia</i> ; (g) <i>Candidatus Udaeobacter</i>       | LC | 0.839 | 0.001 |
| ASV_00224 | (p) <i>Verrucomicrobia</i> ; (g) <i>Candidatus Udaeobacter</i>       | LC | 0.941 | 0.001 |
| ASV_00024 | (p) <i>Verrucomicrobia</i> ; (g) <i>Candidatus Xiphinematobacter</i> | NA | 0.908 | 0.001 |
| ASV_00081 | (p) <i>Verrucomicrobia</i> ; (g) <i>Candidatus Xiphinematobacter</i> | NA | 0.940 | 0.001 |
| ASV_00132 | (p) <i>Verrucomicrobia</i> ; (g) <i>Candidatus Xiphinematobacter</i> | NA | 0.867 | 0.001 |
| ASV_00137 | (p) <i>Verrucomicrobia</i> ; (g) <i>Candidatus Xiphinematobacter</i> | NA | 0.986 | 0.001 |
